# Supplementary material for: A Facile Synthesis of Noble-Metal-Free Catalyst Based on Nitrogen Doped Graphene Oxide for Oxygen Reduction Reaction
Source: MDPI journal article supplement (doi:10.3390/ma15030821), 2022-01-21
Supplement: s1 [file s1]

## Supplementary Materials

# A Facile Synthesis of Noble-Metal-free Catalyst Based on Nitrogen Doped Graphene Oxide for Oxygen Reduction Reaction

Vladimir P. Vasiliev <sup>1,\*</sup>, Roman A. Manzhos <sup>1</sup>, Valeriy K. Kochergin <sup>1</sup>, Alexander G. Krivenko <sup>1</sup>, Eugene N. Kabachkov <sup>1,2</sup>, Alexander V. Kulikov <sup>1</sup>, Yury M. Shulga <sup>1</sup> and Gennady L. Gutsev <sup>3,\*</sup>

<sup>1</sup> Institute of Problems of Chemical Physics of RAS, Acad. Semenov ave., 1, Chernogolovka 142432, Russia; rmanzhos@yandex.ru (R.A.M.); kocherginvk@yandex.ru (V.K.K.); krivenko@icp.ac.ru (A.G.K.); en.kabachkov@gmail.com (E.N.K.); kulav@icp.ac.ru (A.V.K.); yshulga@gmail.com (Y.M.S.)

<sup>2</sup> Chernogolovka Scientific Center, Russian Academy of Sciences, Chernogolovka 142432, Russia

<sup>3</sup> Department of Physics, Florida A&M University, Tallahassee, FL 32307, USA

\* Correspondence: vpvasiliev@mail.ru (V.P.V.); gennady.gutsev@fam.u.edu (G.L.G.)

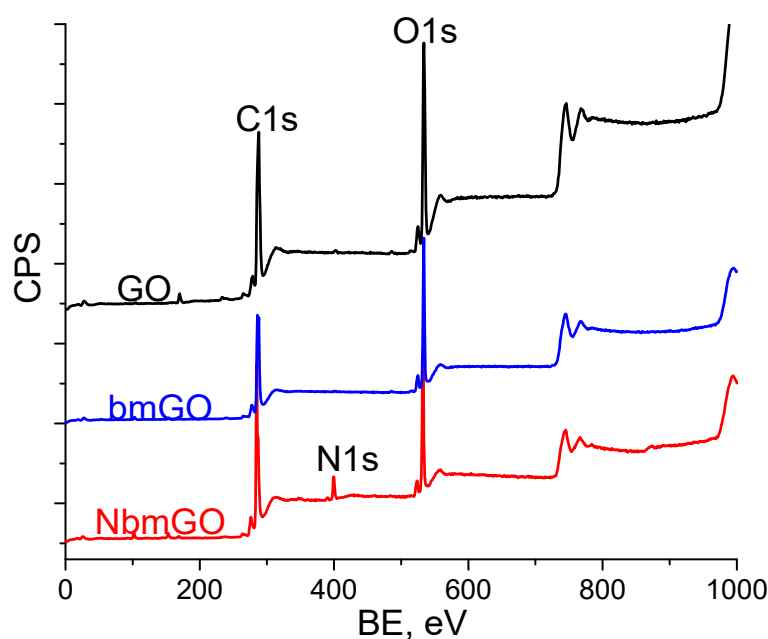

**Figure S1.** XPS survey spectra of the GO, bmGO, and NbmGO samples.

**Table S1.** Elemental composition (in at.%) of the samples under study.

| Samples | Elements, % |     |      |     |
|---------|-------------|-----|------|-----|
|         | C           | N   | O    | S   |
| GO      | 74.3        | 0.3 | 23.5 | 1.9 |
| bmGO    | 76.8        | 0.0 | 23.0 | 0.2 |
| NbmGO   | 76.7        | 5.5 | 17.4 | 0.4 |

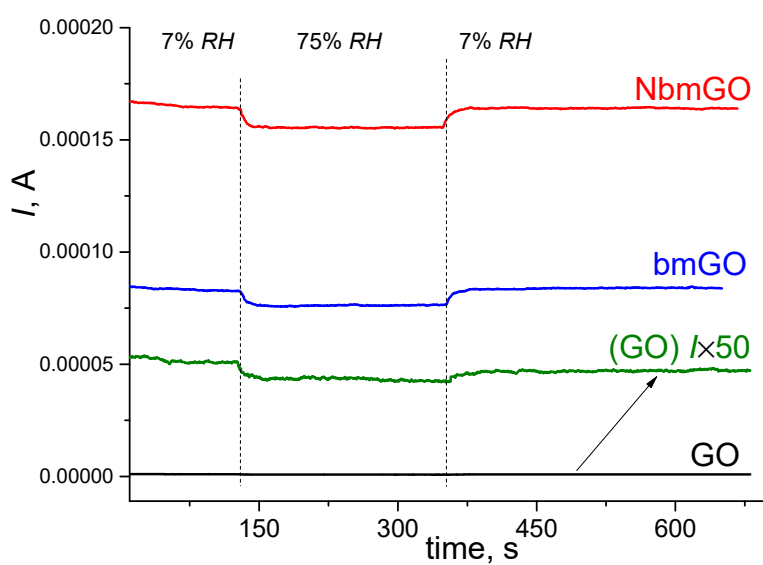

**Figure S2.** The conductivity of GO, bmGO, and NbmGO films at different RH%.

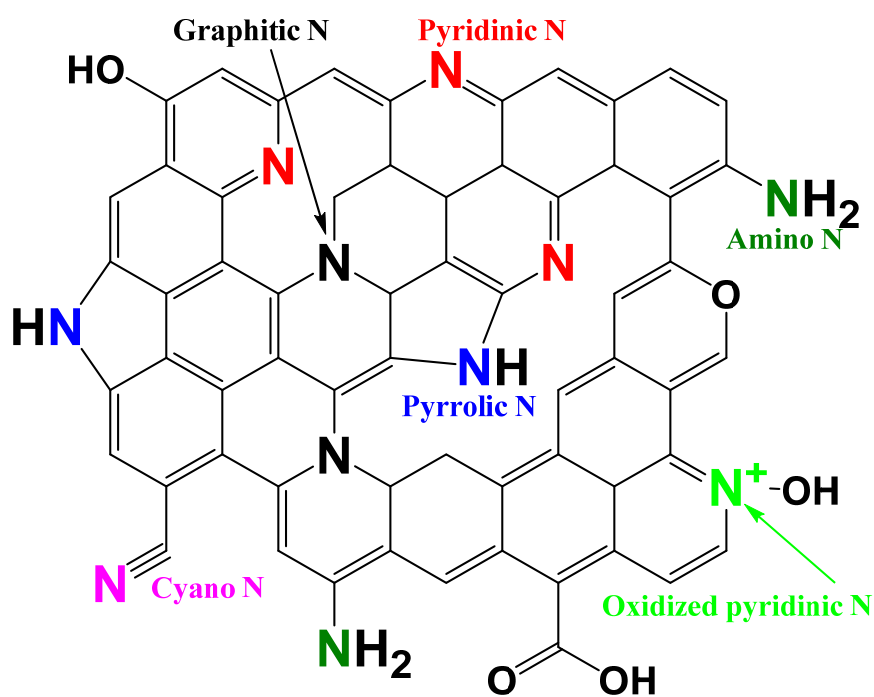

**Figure S3.** A model structure of NbmGO.

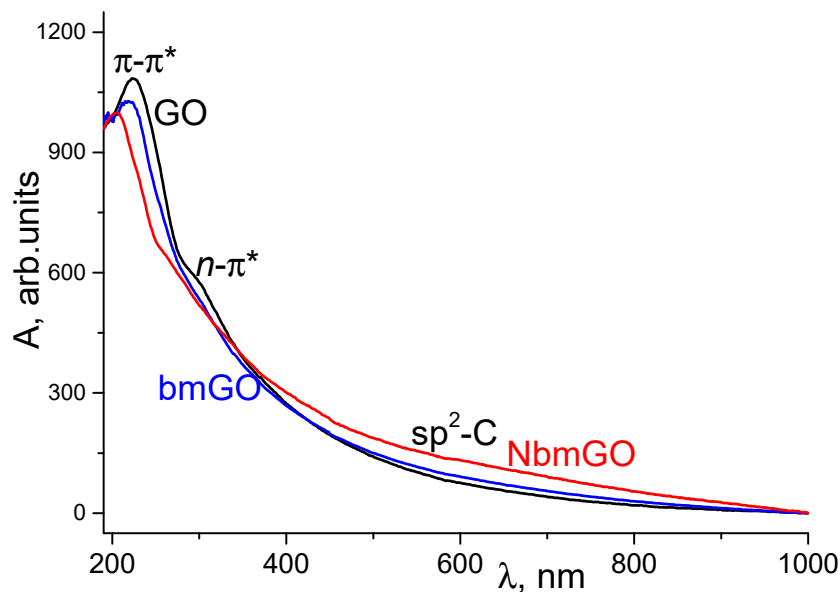

**Figure S4.** Electronic absorption spectra of GO, bmGO and NbmGO films (quartz glass). The maximum of the electronic absorption spectrum shifts to shorter wavelengths (224 nm  $\rightarrow$  205 nm) for the samples of GO, bmGO and NbmGO and there is an increase in absorption observed in the range 400-800 nm, which is typical for  $sp^2$ -carbon.

**Table S2.** Positions ( $E_b$ ), full widths at half maximum (FWHM), and intensities (Int) of the peaks in the XPS spectra of the GO, bmGO and NbmGO samples

| Samples | Line (Peak) | $E_b$ , eV | FWHM, eV | Int, % | Assignment  |
|---------|-------------|------------|----------|--------|-------------|
| GO      | C1s(C1)     | 284.6      | 1.70     | 40.7   | C=C/C-C     |
|         | C1s(C2)     | 286.6      | 1.65     | 41.6   | C-O/C-OH    |
|         | C1s(C3)     | 288.1      | 2.00     | 15.2   | C=O         |
|         | C1s(C4)     | 289.7      | 1.90     | 2.5    | O-C=O       |
|         | O1s         | 533.5      | 2.10     | 100    |             |
| bmGO    | C1s(C1)     | 284.6      | 1.45     | 46.2   | C=C/C-C     |
|         | C1s(C2)     | 286.7      | 1.40     | 43.1   | C-O/C-OH    |
|         | C1s(C3)     | 288.4      | 1.80     | 9.5    | C=O         |
|         | C1s(C4)     | 290.1      | 1.65     | 1.2    | O-C=O       |
|         | O1s         | 533.8      | 2.00     | 100    |             |
| NbmGO   | C1s(C1)     | 284.7      | 1.40     | 57.1   | C=C/C-C     |
|         | C1s(C2)     | 286.7      | 1.65     | 31.1   | C-O/C-OH    |
|         | C1s(C3)     | 288.6      | 1.95     | 10.2   | C=O         |
|         | C1s(C4)     | 290.6      | 1.90     | 1.6    | O-C=O       |
|         | O1s         | 533.9      | 2.00     | 100    |             |
|         | N1s(N1)     | 398.5      | 1.50     | 19.4   | Pyridinic N |
|         | N1s(N2)     | 399.6      | 2.00     | 67.6   | Pyrrolic N  |
|         | N1s(N3)     | 401.0      | 2.60     | 13.0   | Graphitic   |

**Table S3.** Peak positions and the band intensity ratios ( $I_D/I_G$ ) in the Raman spectra of graphite, GO, bmGO, and NbmGO.

| Samples      | Peak position, $cm^{-1}$ |      | $I_D/I_G$ |
|--------------|--------------------------|------|-----------|
|              | D                        | G    |           |
| Graphite [1] | 1350                     | 1583 | —         |
| GO           | 1350                     | 1599 | 0.864     |
| bmGO         | 1348                     | 1598 | 0.962     |
| NbmGO        | 1344                     | 1595 | 1.011     |

**Table S4.** ESR data obtained for samples of GO, bmGO, and NbmGO at room temperature.

| Samples | g-factor | Line widths $\Delta H$ ,<br>mT (G) | Form-factor<br>FF | The number of<br>paramagnetic centers $N$ ,<br>spin/g |
|---------|----------|------------------------------------|-------------------|-------------------------------------------------------|
| GO      | 2.0048   | 0.17 (1.7 G)                       | 3.4               | $5.4 \times 10^{17}$                                  |
| bmGO    | 2.0027   | 0.25 (2.5 G)                       | 3.4               | $5.5 \times 10^{18}$                                  |
| NbmGO   | 2.0034   | 0.39 (3.92 G)                      | 3.6               | $6.2 \times 10^{18}$                                  |

**Table S5.** The characteristic features in the FTIR spectra of GO and melamine

| Absorption bands<br>( $\text{cm}^{-1}$ ) | Description                                                                  |
|------------------------------------------|------------------------------------------------------------------------------|
| <b>GO</b> (see Ref. S2–S8)               |                                                                              |
| 3000–3700                                | stretching vibrations of O–H                                                 |
| 1720–1730                                | stretching vibrations of C=O carbonyl groups and/or ketones                  |
| 1620–1630                                | vibrations of double C=C bonds and bending vibrations of the water molecules |
| 1220–1230                                | C–OH stretching                                                              |
| 1040–1060                                | vibrations epoxy and alkoxy groups                                           |
| <b>Melamine</b> (see Ref. S9–S10)        |                                                                              |
| 3468                                     | stretching vibrations of N–H                                                 |
| 3417                                     | stretching vibrations of N–H                                                 |
| 3324                                     | stretching vibrations of N–H                                                 |
| 3121                                     | stretching vibrations of N–H                                                 |
| 1630–1660                                | NH <sub>2</sub> deformation                                                  |

**Table S6.** Electrochemical properties of N-doped carbon materials.

| No | Catalyst | Half-wave potential/Onset<br>potential (V vs. Ag/AgCl) | Ref. SI   |
|----|----------|--------------------------------------------------------|-----------|
| 1  | NbmGO    | –0.175/–0.09                                           | This work |
| 2  | bmGO     | –0.215/–0.105                                          | This work |
| 3  | rGOA-MS  | –0.295/–0.15                                           | [11]      |
| 4  | NG5      | –0.25/–0.1                                             | [12]      |
| 5  | NG-C     | –0.2/–0.06                                             | [13]      |
| 6  | PDI-900  | –0.215/–0.14                                           | [14]      |
| 7  | NrGO800  | –0.205/–0.08                                           | [15]      |

The chronoamperometry test of NbmGO catalyst was carried out at 2000 rpm in O<sub>2</sub>-saturated 0.1 M KOH solution (Fig. SI5). The high current retention of 93 % after continuous polarization at –250 mV during 720 min clearly demonstrates the excellent long-term stability of NbmGO, which can be attributed to the quite little loss of active sites during the test.

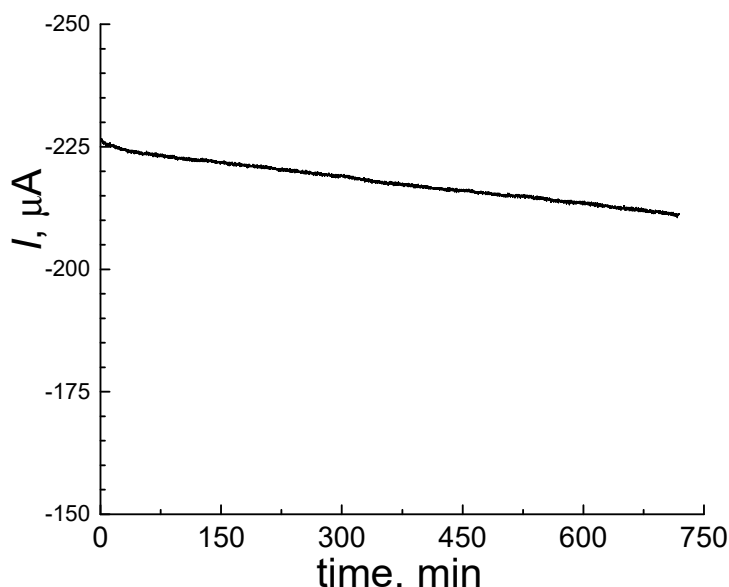

**Figure S5.** Long-term stability of NbmGO *via* chronoamperometry test at –300 mV in 0.1 M KOH and at room temperature,  $\omega = 2000$  rpm.

### Materials and Synthesis of GO

All the materials were used without further purification. Graphite powder (<50  $\mu\text{m}$ , Merck (Germany), 98+%), potassium permanganate (KMnO<sub>4</sub>, Rushim (Russia), 98%), concentrated sulfuric acid (H<sub>2</sub>SO<sub>4</sub>, Rushim (Russia), 99%), nitric acid (HNO<sub>3</sub>, Rushim (Russia), 99%), 30% hydrogen peroxide (H<sub>2</sub>O<sub>2</sub>, Chimmed (Russia), 98%), 37% hydrochloric acid (HCl, Rushim (Russia), 99%). Melamine (C<sub>3</sub>N<sub>6</sub>H<sub>6</sub>, BASFSE (Germany), 99.9%). Graphite oxide was prepared by Hammers [16], with some modification [17]. The elemental composition of the product corresponded to a formula C<sub>8</sub>O<sub>4.6</sub>H<sub>1.8</sub>(H<sub>2</sub>O)<sub>0.58</sub>. According to X-ray diffraction study, the interplanar distance is 0.81 nm in our sample.

## **References S:**

- [S1] Odake, S.; Zinin, P.V.; Hellebrand, E.; Prakapenka, V.; Liu, Y.; Hong, S.; Burgessa, K.; Ming, L-C. Formation of the high-pressure graphite and BC<sub>8</sub> phases in a cold compression experiment by Raman scattering, *J. Raman Spectrosc.*, **2013**, 44, 1596–1602.
- [S2] Si, Y.; Samulski, E.T. Synthesis of water soluble graphene, *Nano Lett.*, **2008**, 8, 1679–1682.
- [S3] Jeong, H.K.; Lee, Y.P.; Jin, M.H.; Kim, E.S.; Bae, J.J.; Lee, Y.H. Thermal stability of graphite oxide, *Chem. Phys. Lett.*, **2009**, 470, 255–258.
- [S4] Cote, L.J.; Cruz-Silva, R.; Huang, J. Flash reduction and patterning of graphite oxide and its polymer composite, *J. Am. Chem. Soc.*, **2009**, 131, 11027–11032.
- [S5] Karthika, P.; Rajalakshmi, N.; Dhathathreyan, K.S. Functionalized exfoliated graphene oxide as supercapacitor electrodes, *Soft Nanosci. Lett.*, **2012**, 2, 59–66.
- [S6] Galande, C.; Mohite, A.D.; Naumov, A.V.; Gao, W.; Ci, L.; Ajayan, A.; Gao, H.; Srivastava, A.; Weisman, R.B.; Ajayan, P.M. Quasi-molecular fluorescence from graphene oxide, *Scientific Reports*, **2011**, vol. 1, p. 85.
- [S7] Fu, M.; Jiao, Q.; Zhao, Y.; Li, H.; Vapor diffusion synthesis of CoFe<sub>2</sub>O<sub>4</sub> hollow sphere/graphene composites as absorbing materials, *J. Mater Chem. A*, **2014**, 2, 735–744.
- [8] Smith, A.L. Applied Infrared Spectroscopy. John Wiley and Sons, Ltd., Chichester, Sussex, **1979**, 322 p.
- [S9] Wang, Y-L.; Mebel, A.M.; Wu, C-J.; Chen, Y-T.; Lina, C-E.; Jiang, J-C. IR spectroscopy and theoretical vibrational calculation of the melamine molecule *J. Chem. Soc., Faraday Trans.*, **1997**, 93, 3445–3451.
- [S10] Costa, L.; Camino, G. Thermal behaviour of melamine, *Journal of Thermal Analysis*, **1988**, 34, 423–429.
- [S11] Manzhos, R.A.; Baskakov, S.A.; Kabachkov, E.N.; Korepanov, V.I.; Dremova, N.N.; Baskakova, Y.V.; Krivenko, A.G.; Shulga, Y.M.; Gutsev G.L. Reduced graphene oxide aerogel inside melamine sponge as an electrocatalyst for the oxygen reduction reaction, *Materials*, **2021**, 14, 322, 12 p.
- [S12] Sheng, Z-H.; Shao, L.; Chen, J-J.; Bao, W-J.; Wang, F-B.; Xia, X-H. Catalyst-Free Synthesis of Nitrogen-Doped Graphene *via* Thermal annealing graphite oxide with melamine and its excellent electrocatalysis, *ACS Nano*, **2011**, vol. 5, p. 4350–4358.
- [S13] Liao, Y.; Gao, Y.; Zhu, S.; Zheng, J.; Chen, Z.; Yin, C.; Lou, X.; Zhang, D. Facile fabrication of N-doped graphene as efficient electrocatalyst for oxygen reduction reaction, *ACS Appl. Mater. Interfaces*, **2015**, 7, 35, 19619–19625.
- [S14] Liu, R.; Wu, D.; Feng, X.; Müllen, K.; Nitrogen-doped ordered mesoporous graphitic arrays with high electrocatalytic activity for oxygen reduction, *Angew. Chem. Int. Ed.*, **2010**, 49, 2565–2569.
- [S15] Lemesa, G.; Sebastiana, D.; Pastor, E.; Lazaro, M.J. N-doped graphene catalysts with high nitrogen concentration for the oxygen reduction reaction, *Journal of Power Sources*, 2019, 438, 227036, 10 p.**
- [S16] Hummers, W.S.; Offeman, R.E. Preparation of graphitic oxide, *J. Am. Chem. Soc.*, **1958**, 80, 1339.
- [S17] Muradyan, V.E.; Ezernitskaya, M.G.; Smirnova, V.I.; Kabaeva, N.M.; Novikov, Y.N.; Parnes, Z.N.; Volpin, M.E. Transformation of Graphitic oxide under ionic hydrogenation conditions, *Russ. J. Gen. Chem.*, **1991**, 61, 2433–2435.
